# Supplementary material for: PP2A/B55α substrate recruitment as defined by the retinoblastoma-related protein p107
Source: eLife. 2021 Oct 18;10:e63181. doi: 10.7554/eLife.63181 (PMC8575462; doi:10.7554/eLife.63181)
Supplement: Figure 6—source data 2. [file elife-63181-fig6-data2.xlsx]

## Sheet: description
Column description
column A	protein name
column B	uniprot accession
column C	protein description
column D	maximum xcorr parameter for protein identification
column E	maximum dcn parameter for protein identification
column F	minimum part per million parameter for protein identification
column G	tp[WT1]
column H	up[WT1]
column I	um[WT1]
column J	tp[WT2]
column K	up[WT2]
column L	um[WT2]
column M	tp[WT3]
column N	up[WT3]
column O	um[WT3]
column P	tp[MUT1]
column Q	up[MUT1]
column R	um[MUT1]
column S	tp[MUT2]
column T	up[MUT2]
column U	um[MUT2]
column V	tp[MUT3]
column W	up[MUT3]
column X	um[MUT3]
column Y	log2 area [WT1]
column Z	log2 area [WT2]
column AA	log2 area [WT3]
column AB	log2 area [MUT1]
column AC	log2 area [MUT2]
column AD	log2 area [MUT3]
column AE	pvalue WT-MUT
column AF	log2 ratio WT-MUT

## Sheet: proteins
name	accession	description	xcorr_max	dcn_max	ppm_min	tp[WT1]	up[WT1]	um[WT1]	tp[WT2]	up[WT2]	um[WT2]	tp[WT3]	up[WT3]	um[WT3]	tp[MUT1]	up[MUT1]	um[MUT1]	tp[MUT2]	up[MUT2]	um[MUT2]	tp[MUT3]	up[MUT3]	um[MUT3]	log2 area [WT1]	log2 area [WT2]	log2 area [WT3]	log2 area [MUT1]	log2 area [MUT2]	log2 area [MUT3]	pvalue WT-MUT	log2 ratio WT-MUT
GFP	GFP	GFP	5.364	0.7438	0.008085	84	17	17	95	17	17	98	16	16	131	19	19	116	17	17	85	16	16	31.9279	31.9279	31.9279	31.9279	31.9279	31.9279	1	0
2ABA_HUMAN	P63151	Serine/threonine-protein phosphatase 2A 55 kDa regulatory subunit B alpha isoform OS=Homo sapiens OX=9606 GN=PPP2R2A PE=1 SV=1	2.88	0.716	0.370178	2	2	0	3	3	2	4	4	3	0	0	0	0	0	0	0	0	0	17.1424	18.0359	18.1655	12.1771	13.4503	10.95	0.00210937	5.58879
2AAA_HUMAN	P30153	Serine/threonine-protein phosphatase 2A 65 kDa regulatory subunit A alpha isoform OS=Homo sapiens OX=9606 GN=PPP2R1A PE=1 SV=4	2.478	0.5638	0.609745	2	2	2	1	1	1	1	1	1	0	0	0	0	0	0	0	0	0	16.1551	15.4916	14.622	12.9715	11.7315	11.614	0.00591733	3.31725
EF1B_HUMAN	P24534	Elongation factor 1-beta OS=Homo sapiens OX=9606 GN=EEF1B2 PE=1 SV=3	4.429	0.8088	0.053182	11	9	7	15	13	11	17	12	10	14	8	7	11	8	7	9	7	6	25.1255	25.4506	25.4974	24.476	24.8509	24.7694	0.0156304	0.659055
GSTM2_HUMAN	P28161	Glutathione S-transferase Mu 2 OS=Homo sapiens OX=9606 GN=GSTM2 PE=1 SV=2	3.969	0.7728	0.008452	15	13	6	15	14	7	18	15	6	21	17	7	25	19	9	18	17	8	24.7687	24.9569	24.9738	25.3788	25.4717	25.0679	0.0427885	-0.406308
GSTM3_HUMAN	P21266	Glutathione S-transferase Mu 3 OS=Homo sapiens OX=9606 GN=GSTM3 PE=1 SV=3	4.102	0.7571	0.00789	14	11	9	15	10	9	15	13	11	16	13	11	14	11	10	16	13	11	25.086	25.1798	25.4584	25.8256	25.7161	25.5645	0.0269955	-0.460661
LC7L2_HUMAN	Q9Y383	Putative RNA-binding protein Luc7-like 2 OS=Homo sapiens OX=9606 GN=LUC7L2 PE=1 SV=2	1.699	0.3767	0.003249	0	0	0	0	0	0	0	0	0	1	1	0	1	1	0	2	2	1	12.5164	10.5246	13.0274	15.8511	15.7806	17.3641	0.00948503	-4.30912
EWS_HUMAN	Q01844	RNA-binding protein EWS OS=Homo sapiens OX=9606 GN=EWSR1 PE=1 SV=1	3.401	0.6157	0.378647	0	0	0	0	0	0	1	1	1	1	1	1	0	0	0	2	2	2	11.6003	11.6903	11.5559	18.5778	13.3016	16.6713	0.0415331	-4.56807
PI42C_HUMAN	Q8TBX8	Phosphatidylinositol 5-phosphate 4-kinase type-2 gamma OS=Homo sapiens OX=9606 GN=PIP4K2C PE=1 SV=3	2.957	0.6764	0.097693	0	0	0	0	0	0	0	0	0	3	3	3	1	1	1	2	2	2	12.7764	12.1767	13.0971	18.3087	16.1974	17.4172	0.00229481	-4.62437
PI42A_HUMAN	P48426	Phosphatidylinositol 5-phosphate 4-kinase type-2 alpha OS=Homo sapiens OX=9606 GN=PIP4K2A PE=1 SV=2	1.746	0.5465	0.162973	0	0	0	0	0	0	0	0	0	2	2	1	1	1	0	2	2	0	10.9547	12.4159	12.8927	17.3282	16.3448	17.5909	0.00198343	-5.0002
ARRB2_HUMAN	P32121	Beta-arrestin-2 OS=Homo sapiens OX=9606 GN=ARRB2 PE=1 SV=2	3.132	0.6766	0.00587	0	0	0	0	0	0	0	0	0	4	3	3	5	4	4	4	4	4	12.83	12.5127	12.1313	19.5149	19.4642	19.047	1.064e-05	-6.85069
SRP14_HUMAN	P37108	Signal recognition particle 14 kDa protein OS=Homo sapiens OX=9606 GN=SRP14 PE=1 SV=2	2.292	0.5963	0.004329	0	0	0	1	1	1	0	0	0	5	5	5	4	4	4	4	3	3	11.9921	18.019	12.0605	21.6469	20.2442	21.3579	0.0259262	-7.05913
HSP7C_HUMAN	P11142	Heat shock cognate 71 kDa protein OS=Homo sapiens OX=9606 GN=HSPA8 PE=1 SV=1	3.964	0.7901	0.012874	17	17	9	23	20	10	27	22	13	13	13	4	9	9	3	19	17	8	22.1403	22.5876	22.6205	20.9649	20.1149	21.9379	0.0582075	1.44358
LANC1_HUMAN	O43813	Glutathione S-transferase LANCL1 OS=Homo sapiens OX=9606 GN=LANCL1 PE=1 SV=1	2.45	0.6588	0.135499	1	1	1	2	2	2	1	1	1	4	4	4	3	3	3	1	1	1	16.4143	18.538	17.7713	20.4857	19.323	18.9191	0.0619152	-2.00141
PSA2_HUMAN	P25787	Proteasome subunit alpha type-2 OS=Homo sapiens OX=9606 GN=PSMA2 PE=1 SV=2	2.447	0.6056	0.432343	0	0	0	2	2	2	1	1	1	0	0	0	0	0	0	0	0	0	13.2305	19.3164	17.17	13.2504	10.9526	11.8127	0.074459	4.56708
EF1A2_HUMAN	Q05639	Elongation factor 1-alpha 2 OS=Homo sapiens OX=9606 GN=EEF1A2 PE=1 SV=1	5.883	0.7798	0.029916	23	14	3	28	15	3	31	16	2	37	18	4	29	18	5	30	17	4	26.8957	27.2225	27.5894	27.9482	27.7261	27.602	0.0803279	-0.522869
PEPL_HUMAN	O60437	Periplakin OS=Homo sapiens OX=9606 GN=PPL PE=1 SV=4	2.651	0.4487	0.11349	0	0	0	0	0	0	0	0	0	1	1	1	0	0	0	10	10	10	11.9103	14.2294	11.9566	16.3718	13.497	16.7669	0.0908594	-2.84649
EF1G_HUMAN	P26641	Elongation factor 1-gamma OS=Homo sapiens OX=9606 GN=EEF1G PE=1 SV=3	4.596	0.7542	0.008749	46	21	21	49	21	21	57	22	22	69	26	26	55	25	25	51	23	23	27.6606	27.5787	28.2807	28.9089	28.4261	28.1789	0.0973605	-0.664679
SPTN2_HUMAN	O15020	Spectrin beta chain, non-erythrocytic 2 OS=Homo sapiens OX=9606 GN=SPTBN2 PE=1 SV=3	3.907	0.6483	0.096071	0	0	0	0	0	0	0	0	0	3	3	1	0	0	0	5	5	2	12.3279	11.2237	11.3267	15.9199	11.8261	15.9763	0.10623	-2.94804
LCN1_HUMAN	P31025	Lipocalin-1 OS=Homo sapiens OX=9606 GN=LCN1 PE=1 SV=1	2.28	0.6197	0.707811	0	0	0	2	2	1	1	1	0	0	0	0	0	0	0	0	0	0	11.9261	19.2732	18.9514	12.2358	12.3163	10.8208	0.11428	4.92594
LAP2A_HUMAN	P42166	Lamina-associated polypeptide 2, isoform alpha OS=Homo sapiens OX=9606 GN=TMPO PE=1 SV=2	2.235	0.5655	1.0549	0	0	0	0	0	0	0	0	0	1	1	0	0	0	0	2	2	1	11.6906	12.3891	12.1116	14.9695	12.0792	16.0681	0.128303	-2.30856
PI51A_HUMAN	Q99755	Phosphatidylinositol 4-phosphate 5-kinase type-1 alpha OS=Homo sapiens OX=9606 GN=PIP5K1A PE=1 SV=1	2.418	0.5715	0.395768	0	0	0	0	0	0	0	0	0	1	1	1	0	0	0	3	3	1	11.1609	13.3624	11.3089	15.0378	12.5725	17.9171	0.130081	-3.23171
S10A7_HUMAN	P31151	Protein S100-A7 OS=Homo sapiens OX=9606 GN=S100A7 PE=1 SV=4	2.214	0.6619	1.30765	1	1	1	2	2	1	2	2	1	0	0	0	0	0	0	2	2	1	18.394	19.6452	20.3065	11.2367	11.9282	19.7962	0.141184	5.1282
RHOA_HUMAN	P61586	Transforming protein RhoA OS=Homo sapiens OX=9606 GN=RHOA PE=1 SV=1	3.055	0.5643	0.09936	0	0	0	0	0	0	0	0	0	2	1	1	0	0	0	1	1	1	12.4986	10.0367	12.5403	17.7021	11.6555	17.5631	0.141259	-3.94841
DCA11_HUMAN	Q8TEB1	DDB1- and CUL4-associated factor 11 OS=Homo sapiens OX=9606 GN=DCAF11 PE=1 SV=1	2.061	0.5778	0.407548	0	0	0	1	1	1	1	1	1	3	3	3	2	2	2	2	2	2	10.503	16.5726	15.5394	18.3231	17.7281	16.9313	0.145894	-3.45581
SYCC_HUMAN	P49589	Cysteine--tRNA ligase, cytoplasmic OS=Homo sapiens OX=9606 GN=CARS PE=1 SV=3	3.105	0.7184	0.19508	0	0	0	2	2	2	3	3	3	5	5	5	7	7	7	2	2	2	11.1098	16.4264	16.6939	18.1587	18.2668	17.3381	0.159564	-3.17782
GSTP1_HUMAN	P09211	Glutathione S-transferase P OS=Homo sapiens OX=9606 GN=GSTP1 PE=1 SV=2	6.323	0.8193	0.000715	23	13	13	36	17	17	34	16	16	34	15	15	36	17	17	38	17	17	27.8415	28.4033	28.3828	28.8092	28.6252	28.3517	0.164056	-0.386147
TMA7_HUMAN	Q9Y2S6	Translation machinery-associated protein 7 OS=Homo sapiens OX=9606 GN=TMA7 PE=1 SV=1	1.773	0.4098	0.328738	0	0	0	1	1	1	2	2	2	0	0	0	0	0	0	0	0	0	10.6426	19.8846	21.1722	11.1884	11.5359	12.2037	0.168441	5.59046
CC124_HUMAN	Q96CT7	Coiled-coil domain-containing protein 124 OS=Homo sapiens OX=9606 GN=CCDC124 PE=1 SV=1	2.789	0.6608	0.11167	0	0	0	4	4	4	3	3	3	0	0	0	0	0	0	0	0	0	10.976	20.5354	18.9683	11.9543	11.4666	12.8487	0.188042	4.73674
HAP28_HUMAN	Q13442	28 kDa heat- and acid-stable phosphoprotein OS=Homo sapiens OX=9606 GN=PDAP1 PE=1 SV=1	2.417	0.6656	0.17518	0	0	0	4	4	4	1	1	1	0	0	0	0	0	0	0	0	0	12.1841	19.7662	15.3622	12.1791	12.7585	11.9421	0.190951	3.47764
IRS4_HUMAN	O14654	Insulin receptor substrate 4 OS=Homo sapiens OX=9606 GN=IRS4 PE=1 SV=1	1.82	0.5765	0.508055	0	0	0	0	0	0	1	1	1	2	2	2	0	0	0	2	2	2	13.0093	11.8974	14.1197	15.5337	12.9345	15.8255	0.192243	-1.75579
S10A8_HUMAN	P05109	Protein S100-A8 OS=Homo sapiens OX=9606 GN=S100A8 PE=1 SV=1	2.703	0.625	0.240545	2	2	2	8	7	7	7	6	6	1	1	1	2	2	2	5	4	4	20.3275	23.7514	22.2996	18.3338	19.579	22.0002	0.214957	2.15514
S10A9_HUMAN	P06702	Protein S100-A9 OS=Homo sapiens OX=9606 GN=S100A9 PE=1 SV=1	3.391	0.5826	0.015629	2	2	2	8	6	6	4	3	3	0	0	0	2	2	2	3	2	2	20.3318	23.2345	22.1532	12.4221	19.7115	21.1542	0.217258	4.14387
NPM_HUMAN	P06748	Nucleophosmin OS=Homo sapiens OX=9606 GN=NPM1 PE=1 SV=2	3.787	0.7457	0.072222	2	2	2	4	4	4	3	3	3	7	7	7	4	4	4	6	6	6	20.2652	21.2017	21.6793	22.5632	20.839	23.223	0.231694	-1.1596
CBR1_HUMAN	P16152	Carbonyl reductase [NADPH] 1 OS=Homo sapiens OX=9606 GN=CBR1 PE=1 SV=3	6.563	0.8026	0.001725	31	18	15	36	19	16	42	19	16	56	21	18	49	22	19	42	19	16	27.4635	27.644	27.8542	28.0788	27.6514	27.946	0.23249	-0.23814
ZA2G_HUMAN	P25311	Zinc-alpha-2-glycoprotein OS=Homo sapiens OX=9606 GN=AZGP1 PE=1 SV=2	3.15	0.692	0.013516	1	1	1	9	8	8	3	3	3	1	1	1	0	0	0	2	2	2	17.1226	20.8979	19.5481	17.8054	10.5701	18.0093	0.237207	3.72797
ACTN4_HUMAN	O43707	Alpha-actinin-4 OS=Homo sapiens OX=9606 GN=ACTN4 PE=1 SV=2	3.639	0.7059	0.029234	0	0	0	0	0	0	1	1	1	2	2	1	0	0	0	22	22	15	13.0808	12.4425	15.0317	15.3863	13.5929	20.1525	0.246268	-2.85889
NUCL_HUMAN	P19338	Nucleolin OS=Homo sapiens OX=9606 GN=NCL PE=1 SV=3	3.531	0.757	0.00193	1	1	1	8	8	8	6	6	6	11	11	11	6	6	6	13	13	13	14.9792	18.3089	18.5436	19.3065	17.7493	20.1966	0.253269	-1.80692
CBR3_HUMAN	O75828	Carbonyl reductase [NADPH] 3 OS=Homo sapiens OX=9606 GN=CBR3 PE=1 SV=3	4.474	0.7763	0.001725	10	4	1	9	5	2	11	5	2	13	5	2	10	5	2	11	5	2	25.4565	26.6272	26.8023	26.9763	26.759	26.8513	0.255141	-0.566887
CAPZB_HUMAN	P47756	F-actin-capping protein subunit beta OS=Homo sapiens OX=9606 GN=CAPZB PE=1 SV=4	2.131	0.6012	0.163444	0	0	0	0	0	0	2	2	2	2	2	2	0	0	0	3	3	3	11.7063	12.0564	17.756	17.9716	13.7509	19.8217	0.277271	-3.34181
COR1C_HUMAN	Q9ULV4	Coronin-1C OS=Homo sapiens OX=9606 GN=CORO1C PE=1 SV=1	2.34	0.6248	0.230926	0	0	0	0	0	0	2	2	2	3	3	3	0	0	0	7	7	7	11.886	11.8393	16.7849	17.1553	13.0086	20.1197	0.28401	-3.25783
RALA_HUMAN	P11233	Ras-related protein Ral-A OS=Homo sapiens OX=9606 GN=RALA PE=1 SV=1	3.13	0.7387	0.004669	0	0	0	0	0	0	6	6	3	6	6	3	0	0	0	7	7	3	13.5156	10.6509	20.1612	21.0699	14.234	21.7985	0.314653	-4.25822
PAIRB_HUMAN	Q8NC51	Plasminogen activator inhibitor 1 RNA-binding protein OS=Homo sapiens OX=9606 GN=SERBP1 PE=1 SV=2	4.122	0.7748	0.216069	0	0	0	18	14	14	9	8	8	4	4	4	0	0	0	0	0	0	11.5929	22.269	20.867	17.96	11.8162	11.4921	0.32003	4.48688
SPTB2_HUMAN	Q01082	Spectrin beta chain, non-erythrocytic 1 OS=Homo sapiens OX=9606 GN=SPTBN1 PE=1 SV=2	4.496	0.7404	0.005831	0	0	0	0	0	0	36	35	34	57	55	51	0	0	0	60	55	51	10.707	11.6595	19.6469	20.6885	12.8147	21.1859	0.342032	-4.22522
RAP1A_HUMAN	P62834	Ras-related protein Rap-1A OS=Homo sapiens OX=9606 GN=RAP1A PE=1 SV=1	3.093	0.6464	0.040497	0	0	0	0	0	0	1	1	0	2	2	1	0	0	0	4	4	1	12.2429	11.8833	17.9264	19.3319	12.2782	20.5404	0.356932	-3.36597
DDB1_HUMAN	Q16531	DNA damage-binding protein 1 OS=Homo sapiens OX=9606 GN=DDB1 PE=1 SV=1	2.336	0.7273	0.129326	0	0	0	3	3	3	4	4	4	4	4	4	4	4	4	3	3	3	10.7547	16.9346	17.7174	17.3521	17.3995	17.3461	0.368427	-2.23037
FBX50_HUMAN	Q6ZVX7	F-box only protein 50 OS=Homo sapiens OX=9606 GN=NCCRP1 PE=1 SV=1	3.058	0.5899	0.088012	0	0	0	3	3	3	4	4	4	2	2	2	3	3	3	7	7	7	13.8343	19.8721	20.2083	19.1627	18.801	23.6501	0.378245	-2.5664
DSG2_HUMAN	Q14126	Desmoglein-2 OS=Homo sapiens OX=9606 GN=DSG2 PE=1 SV=2	2.199	0.6262	0.407788	0	0	0	0	0	0	3	3	3	1	1	1	0	0	0	6	6	6	10.4062	12.5025	16.4175	14.5199	13.458	17.5984	0.388448	-2.08336
THIO_HUMAN	P10599	Thioredoxin OS=Homo sapiens OX=9606 GN=TXN PE=1 SV=3	2.845	0.626	0.067412	2	2	2	4	4	4	1	1	1	0	0	0	1	1	1	3	3	3	20.2361	22.6829	20.8042	10.9486	20.502	22.2685	0.405875	3.33472
MRP_HUMAN	P49006	MARCKS-related protein OS=Homo sapiens OX=9606 GN=MARCKSL1 PE=1 SV=2	3.764	0.739	0.049229	0	0	0	0	0	0	2	2	2	4	4	4	0	0	0	3	3	3	12.0721	13.0399	20.0248	21.4093	12.9023	21.2145	0.409149	-3.4631
SRSF1_HUMAN	Q07955	Serine/arginine-rich splicing factor 1 OS=Homo sapiens OX=9606 GN=SRSF1 PE=1 SV=2	2.227	0.511	0.67735	0	0	0	0	0	0	1	1	1	1	1	1	0	0	0	2	2	2	12.3529	12.0496	17.2301	16.6962	12.6571	19.3368	0.411306	-2.35252
SRSF3_HUMAN	P84103	Serine/arginine-rich splicing factor 3 OS=Homo sapiens OX=9606 GN=SRSF3 PE=1 SV=1	2.001	0.5925	0.702148	0	0	0	0	0	0	2	2	2	1	1	1	0	0	0	1	1	1	12.8808	9.87521	19.2078	17.9887	13.5258	19.2001	0.419756	-2.91693
SPTN1_HUMAN	Q13813	Spectrin alpha chain, non-erythrocytic 1 OS=Homo sapiens OX=9606 GN=SPTAN1 PE=1 SV=3	4.845	0.7411	0.000313	0	0	0	0	0	0	58	56	56	65	62	62	0	0	0	90	83	83	11.7079	11.7982	20.032	20.4663	12.31	21.279	0.427846	-3.50574
MARCS_HUMAN	P29966	Myristoylated alanine-rich C-kinase substrate OS=Homo sapiens OX=9606 GN=MARCKS PE=1 SV=4	1.652	0.3868	0.372744	0	0	0	0	0	0	2	2	2	1	1	1	0	0	0	1	1	1	11.7933	9.52241	18.4405	17.8128	12.0058	18.9257	0.431659	-2.99601
TAD2B_HUMAN	Q86TJ2	Transcriptional adapter 2-beta OS=Homo sapiens OX=9606 GN=TADA2B PE=1 SV=2	1.985	0.4862	0.056544	2	1	1	2	1	1	0	0	0	2	1	1	2	1	1	1	1	1	18.7094	21.0528	13.4043	19.1778	18.7468	21.4645	0.438743	-2.07419
TCP4_HUMAN	P53999	Activated RNA polymerase II transcriptional coactivator p15 OS=Homo sapiens OX=9606 GN=SUB1 PE=1 SV=3	2.195	0.5808	0.035373	0	0	0	3	3	3	2	2	2	1	1	1	0	0	0	0	0	0	11.0663	18.6675	19.0936	17.1053	11.8916	11.789	0.441848	2.68051
HUTH_HUMAN	P42357	Histidine ammonia-lyase OS=Homo sapiens OX=9606 GN=HAL PE=1 SV=1	3.243	0.6719	0.088541	0	0	0	8	7	7	4	4	4	0	0	0	1	1	1	4	4	4	14.0342	19.2138	18.5434	13.042	14.5575	18.4039	0.444816	1.92938
SPB12_HUMAN	Q96P63	Serpin B12 OS=Homo sapiens OX=9606 GN=SERPINB12 PE=1 SV=1	3.346	0.6625	0.140367	2	2	2	4	4	4	8	8	8	2	2	2	2	2	2	7	6	6	20.6424	20.7818	21.2897	18.1364	18.5319	22.5067	0.449659	1.17968
KNG1_HUMAN	P01042	Kininogen-1 OS=Homo sapiens OX=9606 GN=KNG1 PE=1 SV=2	1.729	0.3557	0.09525	0	0	0	1	1	1	2	1	1	2	1	1	1	1	1	1	1	1	11.8474	17.4289	17.3303	16.5982	16.5487	18.2626	0.453096	-1.60097
K0825_HUMAN	Q8IV33	Uncharacterized protein KIAA0825 OS=Homo sapiens OX=9606 GN=KIAA0825 PE=2 SV=3	1.24	0.3234	0.756334	1	1	1	1	1	1	0	0	0	1	1	1	2	1	1	1	1	1	16.6004	20.8035	13.4437	16.2446	18.7048	23.1062	0.457957	-2.40264
GSTA4_HUMAN	O15217	Glutathione S-transferase A4 OS=Homo sapiens OX=9606 GN=GSTA4 PE=1 SV=1	4.087	0.6653	0.005331	6	6	6	11	9	9	14	11	11	12	10	10	12	9	9	11	10	10	21.9022	22.788	22.8815	23.4721	22.3327	22.8614	0.466226	-0.364889
HORN_HUMAN	Q86YZ3	Hornerin OS=Homo sapiens OX=9606 GN=HRNR PE=1 SV=2	6.005	0.8491	0.024522	8	7	7	29	23	23	36	25	25	21	17	17	28	23	23	36	25	25	18.8784	20.5768	20.9593	19.5012	20.91	22.681	0.470253	-0.892533
DCD_HUMAN	P81605	Dermcidin OS=Homo sapiens OX=9606 GN=DCD PE=1 SV=2	3.921	0.6251	0.078651	3	3	3	8	5	5	4	4	4	3	3	3	5	4	4	4	4	4	21.6055	25.0483	23.4791	22.1024	22.7838	22.8438	0.477485	0.800951
PLAK_HUMAN	P14923	Junction plakoglobin OS=Homo sapiens OX=9606 GN=JUP PE=1 SV=3	4.606	0.7672	0.016224	4	4	4	13	12	11	26	21	20	13	12	12	14	13	13	48	31	30	17.8609	19.9699	22.1376	19.8603	19.7275	25.5672	0.491716	-1.72883
IGHG1_HUMAN	P01857	Immunoglobulin heavy constant gamma 1 OS=Homo sapiens OX=9606 GN=IGHG1 PE=1 SV=1	3.775	0.6927	0.242384	0	0	0	3	3	2	0	0	0	1	1	1	0	0	0	4	4	3	12.3429	19.9172	10.8601	19.0204	11.0942	23.3187	0.491809	-3.4377
CBPA4_HUMAN	Q9UI42	Carboxypeptidase A4 OS=Homo sapiens OX=9606 GN=CPA4 PE=1 SV=2	2.398	0.5721	0.264499	0	0	0	2	2	2	2	2	2	0	0	0	0	0	0	2	2	2	12.2711	18.5014	17.7187	12.4564	11.7111	18.0242	0.494118	2.09986
TRFL_HUMAN	P02788	Lactotransferrin OS=Homo sapiens OX=9606 GN=LTF PE=1 SV=6	2.078	0.6665	0.339169	0	0	0	2	2	2	2	2	2	0	0	0	0	0	0	1	1	1	11.0011	16.9739	16.7647	12.7037	11.6427	15.4003	0.501256	1.66437
GNAI3_HUMAN	P08754	Guanine nucleotide-binding protein G(i) subunit alpha OS=Homo sapiens OX=9606 GN=GNAI3 PE=1 SV=3	3.224	0.6458	0.256463	0	0	0	0	0	0	2	2	0	2	2	0	0	0	0	5	5	2	11.9984	11.9413	19.9435	19.646	11.7631	21.1506	0.503817	-2.89216
PLEC_HUMAN	Q15149	Plectin OS=Homo sapiens OX=9606 GN=PLEC PE=1 SV=3	5.091	0.7393	0.031867	0	0	0	2	2	2	39	39	36	56	56	56	0	0	0	72	70	63	13.5268	12.7289	18.1004	18.5473	12.3062	19.7385	0.505946	-2.07863
VIME_HUMAN	P08670	Vimentin OS=Homo sapiens OX=9606 GN=VIM PE=1 SV=4	6.157	0.8137	0.007189	0	0	0	17	17	13	80	54	45	75	53	45	4	4	4	76	56	48	11.129	20.8978	26.7143	26.4473	17.1205	27.3853	0.507869	-4.07066
GGH_HUMAN	Q92820	Gamma-glutamyl hydrolase OS=Homo sapiens OX=9606 GN=GGH PE=1 SV=2	3.248	0.6696	0.013371	0	0	0	2	2	2	1	1	1	0	0	0	0	0	0	4	4	4	13.2717	18.3494	16.925	10.261	11.0015	19.8944	0.514115	2.46304
PSA7_HUMAN	O14818	Proteasome subunit alpha type-7 OS=Homo sapiens OX=9606 GN=PSMA7 PE=1 SV=1	2.104	0.5021	0.408298	0	0	0	2	2	1	2	2	1	0	0	0	0	0	0	1	1	0	11.8289	18.9907	17.9604	12.1485	11.9417	18.2637	0.5211	2.14203
EFHD2_HUMAN	Q96C19	EF-hand domain-containing protein D2 OS=Homo sapiens OX=9606 GN=EFHD2 PE=1 SV=1	2.407	0.5015	0.41396	0	0	0	0	0	0	3	3	3	2	2	2	0	0	0	2	2	2	10.6011	11.9569	19.2228	17.8713	12.4455	18.2603	0.526455	-2.26543
RBMX_HUMAN	P38159	RNA-binding motif protein, X chromosome OS=Homo sapiens OX=9606 GN=RBMX PE=1 SV=3	1.999	0.7224	0.008186	0	0	0	0	0	0	4	4	1	2	2	2	0	0	0	6	6	3	12.1641	10.9563	17.6184	17.2505	10.8104	19.218	0.540611	-2.18005
DESP_HUMAN	P15924	Desmoplakin OS=Homo sapiens OX=9606 GN=DSP PE=1 SV=3	4.824	0.8139	0.007904	15	15	15	40	39	39	83	79	79	35	34	34	44	43	43	229	182	181	17.9545	20.0421	21.6618	19.2843	19.5821	25.1857	0.541852	-1.46455
LIMA1_HUMAN	Q9UHB6	LIM domain and actin-binding protein 1 OS=Homo sapiens OX=9606 GN=LIMA1 PE=1 SV=1	2.596	0.589	0.093269	0	0	0	0	0	0	4	4	4	5	5	4	0	0	0	7	7	7	12.4861	12.4862	17.0068	17.4486	11.3832	18.2602	0.553966	-1.7043
RAC1_HUMAN	P63000	Ras-related C3 botulinum toxin substrate 1 OS=Homo sapiens OX=9606 GN=RAC1 PE=1 SV=1	2.746	0.5433	0.200485	0	0	0	0	0	0	2	2	0	1	1	0	0	0	0	4	4	2	11.7029	12.6032	20.1854	18.3517	12.114	21.4519	0.554669	-2.47536
TBA4A_HUMAN	P68366	Tubulin alpha-4A chain OS=Homo sapiens OX=9606 GN=TUBA4A PE=1 SV=1	3.041	0.6159	0.143431	0	0	0	5	5	0	3	3	0	3	3	0	1	1	0	9	8	1	10.8668	19.5159	18.5349	18.2337	15.3635	21.444	0.563999	-2.0412
BASI_HUMAN	P35613	Basigin OS=Homo sapiens OX=9606 GN=BSG PE=1 SV=2	4.46	0.7142	0.07213	0	0	0	0	0	0	8	7	7	5	4	4	0	0	0	6	5	5	12.7674	12.0999	21.728	20.8391	12.3682	21.2376	0.57079	-2.61659
TPIS_HUMAN	P60174	Triosephosphate isomerase OS=Homo sapiens OX=9606 GN=TPI1 PE=1 SV=3	3.335	0.678	0.127271	0	0	0	2	2	2	0	0	0	0	0	0	1	1	1	5	5	5	12.2619	17.9411	13.8487	12.2884	16.3906	20.8435	0.57538	-1.82359
PSB5_HUMAN	P28074	Proteasome subunit beta type-5 OS=Homo sapiens OX=9606 GN=PSMB5 PE=1 SV=3	2.754	0.6276	0.008777	0	0	0	2	2	2	1	1	1	0	0	0	0	0	0	2	2	2	11.2811	18.6539	16.3927	11.7211	10.7082	18.1511	0.580707	1.91573
GGCT_HUMAN	O75223	Gamma-glutamylcyclotransferase OS=Homo sapiens OX=9606 GN=GGCT PE=1 SV=1	2.901	0.6299	0.158194	0	0	0	2	2	2	1	1	1	1	1	1	1	1	1	4	4	4	11.25	19.2707	17.423	16.7829	15.0015	21.7731	0.585629	-1.87125
CAZA1_HUMAN	P52907	F-actin-capping protein subunit alpha-1 OS=Homo sapiens OX=9606 GN=CAPZA1 PE=1 SV=3	3.107	0.7123	0.061585	0	0	0	0	0	0	1	1	0	1	1	0	0	0	0	6	6	3	12.3704	11.8415	18.1498	17.224	10.9423	20.0935	0.591373	-1.966
PARP1_HUMAN	P09874	Poly [ADP-ribose] polymerase 1 OS=Homo sapiens OX=9606 GN=PARP1 PE=1 SV=4	3.948	0.7287	0.005992	0	0	0	0	0	0	22	20	20	22	21	21	0	0	0	28	26	26	11.1352	12.2822	20.4782	20.5189	10.0217	21.5086	0.594652	-2.71785
H12_HUMAN	P16403	Histone H1.2 OS=Homo sapiens OX=9606 GN=H1-2 PE=1 SV=2	3.219	0.6109	0.114093	0	0	0	5	5	0	4	4	0	5	5	0	1	1	0	5	5	1	12.9961	21.3322	20.9641	21.2972	16.8205	22.6926	0.601171	-1.83932
MOT1_HUMAN	P53985	Monocarboxylate transporter 1 OS=Homo sapiens OX=9606 GN=SLC16A1 PE=1 SV=3	3.174	0.5422	0.008316	0	0	0	0	0	0	2	2	2	2	2	2	0	0	0	1	1	1	12.7117	13.9236	20.1974	20.1201	12.9291	19.2561	0.603842	-1.82421
FILA2_HUMAN	Q5D862	Filaggrin-2 OS=Homo sapiens OX=9606 GN=FLG2 PE=1 SV=1	5.857	0.8083	0.00091	3	3	3	18	15	15	6	6	6	5	5	5	5	5	5	15	12	12	18.2319	21.3231	19.7204	17.8164	18.6849	20.7057	0.606895	0.689449
FUS_HUMAN	P35637	RNA-binding protein FUS OS=Homo sapiens OX=9606 GN=FUS PE=1 SV=1	5.31	0.7716	0.039029	0	0	0	1	1	1	5	5	4	0	0	0	0	0	0	3	3	3	13.6707	15.9725	20.1036	14.6529	11.6508	18.8172	0.611549	1.54201
ANXA1_HUMAN	P04083	Annexin A1 OS=Homo sapiens OX=9606 GN=ANXA1 PE=1 SV=2	1.964	0.5957	0.02782	1	1	1	2	2	2	0	0	0	0	0	0	0	0	0	2	2	2	17.9074	18.0486	11.9472	13.8134	11.8674	17.8434	0.613902	1.45971
PSB6_HUMAN	P28072	Proteasome subunit beta type-6 OS=Homo sapiens OX=9606 GN=PSMB6 PE=1 SV=4	2.601	0.5298	0.397068	0	0	0	2	2	2	1	1	1	0	0	0	0	0	0	3	3	3	13.6211	19.4401	17.2296	13.192	11.9676	20.1286	0.614181	1.66754
ENOA_HUMAN	P06733	Alpha-enolase OS=Homo sapiens OX=9606 GN=ENO1 PE=1 SV=2	2.819	0.6704	0.065855	0	0	0	6	6	6	0	0	0	1	1	0	0	0	0	12	10	9	11.9411	19.7664	10.7382	15.8024	11.6934	21.385	0.619132	-2.14505
KPYM_HUMAN	P14618	Pyruvate kinase PKM OS=Homo sapiens OX=9606 GN=PKM PE=1 SV=4	2.85	0.6009	0.05028	1	1	0	2	2	1	1	1	0	0	0	0	0	0	0	11	11	10	15.1894	16.372	15.1743	10.3442	9.65379	20.856	0.619291	1.9606
KPYR_HUMAN	P30613	Pyruvate kinase PKLR OS=Homo sapiens OX=9606 GN=PKLR PE=1 SV=2	2.644	0.5551	0.662001	1	1	0	2	2	1	1	1	0	0	0	0	0	0	0	1	1	0	15.1499	16.2678	15.1348	13.1472	10.8648	18.7319	0.620119	1.26951
XRCC6_HUMAN	P12956	X-ray repair cross-complementing protein 6 OS=Homo sapiens OX=9606 GN=XRCC6 PE=1 SV=2	1.774	0.4269	0.050076	0	0	0	0	0	0	2	2	2	2	2	2	0	0	0	1	1	1	12.6572	11.8175	16.485	16.4298	11.8624	15.8667	0.627526	-1.06643
SPB4_HUMAN	P48594	Serpin B4 OS=Homo sapiens OX=9606 GN=SERPINB4 PE=1 SV=2	3.253	0.6318	0.194728	3	3	0	11	11	3	6	6	0	3	3	0	4	4	0	4	4	0	18.3909	22.0695	20.9056	19.5611	19.2907	20.699	0.631797	0.605084
POF1B_HUMAN	Q8WVV4	Protein POF1B OS=Homo sapiens OX=9606 GN=POF1B PE=1 SV=3	4.274	0.6752	0.111926	0	0	0	1	1	1	2	2	2	0	0	0	1	1	1	14	13	13	11.8412	15.5555	17.8219	12.8706	15.3365	21.8468	0.640452	-1.61175
DSC1_HUMAN	Q08554	Desmocollin-1 OS=Homo sapiens OX=9606 GN=DSC1 PE=1 SV=2	4.702	0.7349	0.079961	0	0	0	7	6	6	6	5	5	1	1	1	3	3	3	22	16	16	12.973	20.8857	19.0569	16.0894	18.3899	22.8779	0.659214	-1.48055
ARGI1_HUMAN	P05089	Arginase-1 OS=Homo sapiens OX=9606 GN=ARG1 PE=1 SV=2	3.809	0.6862	0.097047	1	1	1	7	7	7	4	4	4	0	0	0	1	1	1	14	13	13	17.0335	21.4102	19.778	12.308	16.7752	24.0029	0.662524	1.71189
HSPB1_HUMAN	P04792	Heat shock protein beta-1 OS=Homo sapiens OX=9606 GN=HSPB1 PE=1 SV=2	4.161	0.7174	0.000872	3	3	3	3	3	3	3	3	3	0	0	0	1	1	1	18	12	12	18.893	19.3329	19.5808	12.2662	16.502	24.1578	0.664965	1.62693
FABP5_HUMAN	Q01469	Fatty acid-binding protein 5 OS=Homo sapiens OX=9606 GN=FABP5 PE=1 SV=3	3.055	0.7002	0.334741	1	1	1	1	1	1	4	4	4	1	1	1	1	1	1	6	5	5	17.0997	18.9407	21.3656	18.2843	18.0898	24.3517	0.668464	-1.10664
CATD_HUMAN	P07339	Cathepsin D OS=Homo sapiens OX=9606 GN=CTSD PE=1 SV=1	2.236	0.6713	0.109724	0	0	0	4	4	4	2	2	2	0	0	0	0	0	0	9	9	9	12.5912	20.7355	17.7739	10.8204	13.2668	21.4802	0.669233	1.84437
TGM1_HUMAN	P22735	Protein-glutamine gamma-glutamyltransferase K OS=Homo sapiens OX=9606 GN=TGM1 PE=1 SV=4	4.45	0.7037	0.007686	0	0	0	17	16	16	11	11	11	3	3	3	8	8	8	17	17	17	11.3112	21.0087	19.7437	17.0652	18.2588	21.2023	0.673915	-1.48758
PSA4_HUMAN	P25789	Proteasome subunit alpha type-4 OS=Homo sapiens OX=9606 GN=PSMA4 PE=1 SV=1	2.236	0.5928	0.20694	0	0	0	2	2	2	1	1	1	0	0	0	0	0	0	2	2	2	11.3118	18.9988	17.2595	12.7917	11.2532	19.03	0.67578	1.4984
PKP1_HUMAN	Q13835	Plakophilin-1 OS=Homo sapiens OX=9606 GN=PKP1 PE=1 SV=2	3.769	0.8209	0.001916	0	0	0	2	2	2	6	6	6	0	0	0	1	1	1	41	31	31	11.7683	15.0855	18.8268	12.6324	14.2998	24.3636	0.678439	-1.87169
TGM3_HUMAN	Q08188	Protein-glutamine gamma-glutamyltransferase E OS=Homo sapiens OX=9606 GN=TGM3 PE=1 SV=4	3.529	0.7126	0.036089	2	2	2	14	13	13	10	10	10	4	4	4	7	7	7	27	23	23	17.0632	21.357	20.2903	18.6064	19.5328	22.9558	0.689302	-0.794831
NONO_HUMAN	Q15233	Non-POU domain-containing octamer-binding protein OS=Homo sapiens OX=9606 GN=NONO PE=1 SV=4	2.885	0.7028	0.084332	0	0	0	1	1	0	6	6	5	6	6	5	0	0	0	7	7	6	12.1905	17.6538	20.3439	20.6116	13.1038	20.9497	0.692486	-1.49234
H2B3B_HUMAN	Q8N257	Histone H2B type 3-B OS=Homo sapiens OX=9606 GN=HIST3H2BB PE=1 SV=3	3.954	0.7673	0.008582	0	0	0	7	5	0	7	5	0	6	4	0	1	1	0	9	9	1	12.837	22.5729	23.3311	20.6828	19.0349	23.6153	0.695294	-1.53068
PIP_HUMAN	P12273	Prolactin-inducible protein OS=Homo sapiens OX=9606 GN=PIP PE=1 SV=1	2.871	0.7597	0.132494	0	0	0	3	3	3	1	1	1	1	1	1	1	1	1	3	3	2	10.042	20.0572	17.3795	16.5962	15.4207	19.5378	0.696019	-1.35865
PSA6_HUMAN	P60900	Proteasome subunit alpha type-6 OS=Homo sapiens OX=9606 GN=PSMA6 PE=1 SV=1	2.877	0.5791	0.191729	0	0	0	2	2	2	2	2	2	0	0	0	0	0	0	3	3	3	11.0763	18.4234	17.8818	11.4854	12.0037	19.5553	0.702317	1.44572
G3P_HUMAN	P04406	Glyceraldehyde-3-phosphate dehydrogenase OS=Homo sapiens OX=9606 GN=GAPDH PE=1 SV=3	3.676	0.7693	0.035954	3	3	2	18	16	15	7	7	5	5	5	3	6	6	5	21	19	18	19.7537	22.7427	21.3331	20.7257	20.8523	23.8987	0.704939	-0.549057
CDSN_HUMAN	Q15517	Corneodesmosin OS=Homo sapiens OX=9606 GN=CDSN PE=1 SV=3	2.539	0.6756	1.05825	0	0	0	4	2	2	1	1	1	0	0	0	0	0	0	6	3	3	13.8804	17.6646	17.6492	12.9118	11.0798	21.1367	0.705576	1.35533
ANXA2_HUMAN	P07355	Annexin A2 OS=Homo sapiens OX=9606 GN=ANXA2 PE=1 SV=2	5.075	0.7534	0.037429	1	1	0	13	13	4	10	9	2	3	3	1	5	5	1	26	24	6	15.9412	21.7174	20.1655	17.8019	19.1443	23.939	0.708362	-1.02037
SBSN_HUMAN	Q6UWP8	Suprabasin OS=Homo sapiens OX=9606 GN=SBSN PE=1 SV=2	5.104	0.7512	0.102247	1	1	1	10	7	7	1	1	1	1	1	1	0	0	0	7	5	5	14.6355	19.0919	14.6441	14.4918	11.499	19.1587	0.708844	1.07401
BIP_HUMAN	P11021	Endoplasmic reticulum chaperone BiP OS=Homo sapiens OX=9606 GN=HSPA5 PE=1 SV=2	3.471	0.7151	0.029978	3	3	2	9	8	7	10	9	8	17	17	16	3	3	3	16	16	15	17.4452	19.4646	19.6938	20.606	16.8336	20.9419	0.712653	-0.592598
SFPQ_HUMAN	P23246	Splicing factor, proline- and glutamine-rich OS=Homo sapiens OX=9606 GN=SFPQ PE=1 SV=2	3.135	0.7113	0.00794	0	0	0	1	1	0	8	8	7	11	11	10	0	0	0	10	10	9	11.7423	17.2976	20.326	20.7839	12.1046	20.9367	0.719219	-1.48645
ADT2_HUMAN	P05141	ADP/ATP translocase 2 OS=Homo sapiens OX=9606 GN=SLC25A5 PE=1 SV=7	2.722	0.6062	0.037205	0	0	0	1	1	0	1	1	0	1	1	0	0	0	0	8	8	3	12.9606	15.8691	17.0893	16.8419	11.4597	21.1434	0.720213	-1.17533
SPB3_HUMAN	P29508	Serpin B3 OS=Homo sapiens OX=9606 GN=SERPINB3 PE=1 SV=2	3.505	0.6318	0.09181	3	3	0	14	14	6	8	8	2	4	4	1	5	5	1	7	7	3	18.3909	22.2515	21.011	19.749	19.4283	21.0617	0.723684	0.471499
RAB1A_HUMAN	P62820	Ras-related protein Rab-1A OS=Homo sapiens OX=9606 GN=RAB1A PE=1 SV=3	2.011	0.5236	0.181774	0	0	0	1	1	0	2	2	0	0	0	0	0	0	0	5	5	2	12.4714	17.2468	18.2809	12.873	11.2025	20.2341	0.728391	1.22985
KPRP_HUMAN	Q5T749	Keratinocyte proline-rich protein OS=Homo sapiens OX=9606 GN=KPRP PE=1 SV=1	2.938	0.5752	0.142149	1	1	1	3	2	2	3	2	2	4	3	3	2	2	2	3	3	3	17.7605	22.2199	21.0398	19.05	18.0394	22.0964	0.75212	0.611475
LEG7_HUMAN	P47929	Galectin-7 OS=Homo sapiens OX=9606 GN=LGALS7 PE=1 SV=2	3.228	0.6461	0.013443	0	0	0	4	3	3	2	2	2	0	0	0	1	1	1	9	7	7	12.0878	20.8369	19.3766	13.5861	17.9229	25.1076	0.755549	-1.43843
LAMP1_HUMAN	P11279	Lysosome-associated membrane glycoprotein 1 OS=Homo sapiens OX=9606 GN=LAMP1 PE=1 SV=3	2.528	0.5404	0.259532	0	0	0	2	2	2	2	2	2	0	0	0	0	0	0	4	4	4	11.8607	18.0786	17.9935	13.2202	11.5025	20.1137	0.772798	1.03209
HS90A_HUMAN	P07900	Heat shock protein HSP 90-alpha OS=Homo sapiens OX=9606 GN=HSP90AA1 PE=1 SV=5	2.641	0.673	0.035822	1	1	0	5	5	2	0	0	0	1	1	0	0	0	0	5	5	1	14.7092	18.2342	10.8934	15.0739	12.4965	18.8457	0.774842	-0.859739
DESM_HUMAN	P17661	Desmin OS=Homo sapiens OX=9606 GN=DES PE=1 SV=3	4.523	0.6535	0.106415	0	0	0	3	3	0	7	6	1	6	4	0	0	0	0	6	5	1	11.4604	18.4504	23.826	23.7246	10.9834	24.0661	0.779194	-1.67912
CTNB1_HUMAN	P35222	Catenin beta-1 OS=Homo sapiens OX=9606 GN=CTNNB1 PE=1 SV=1	1.987	0.3017	0.654932	0	0	0	1	1	0	1	1	0	0	0	0	0	0	0	2	2	1	13.2371	16.87	17.3971	12.3953	11.1187	20.9709	0.779354	1.00642
LX12B_HUMAN	O75342	Arachidonate 12-lipoxygenase, 12R-type OS=Homo sapiens OX=9606 GN=ALOX12B PE=1 SV=1	2.401	0.6775	0.024956	0	0	0	3	3	3	3	3	3	0	0	0	0	0	0	7	7	7	11.2903	17.8619	17.7075	13.0154	11.7317	19.2946	0.782757	0.93937
GSTM4_HUMAN	Q03013	Glutathione S-transferase Mu 4 OS=Homo sapiens OX=9606 GN=GSTM4 PE=1 SV=3	3.313	0.7	0.081688	7	6	0	6	5	0	9	7	0	11	9	1	9	7	0	7	7	0	23.6158	22.8214	23.7824	23.1611	22.9999	23.7646	0.80777	0.0979595
CATA_HUMAN	P04040	Catalase OS=Homo sapiens OX=9606 GN=CAT PE=1 SV=3	3.839	0.7377	0.125032	0	0	0	12	12	12	4	4	4	0	0	0	1	1	1	15	15	15	12.5182	21.1069	18.701	12.2733	15.5912	21.6263	0.813279	0.945122
DSG1_HUMAN	Q02413	Desmoglein-1 OS=Homo sapiens OX=9606 GN=DSG1 PE=1 SV=2	4.455	0.7975	0.022357	2	2	2	28	22	22	17	16	16	5	5	5	14	13	13	54	37	37	17.359	22.0919	21.055	18.1565	19.5806	24.5035	0.821458	-0.578238
IGHA1_HUMAN	P01876	Immunoglobulin heavy constant alpha 1 OS=Homo sapiens OX=9606 GN=IGHA1 PE=1 SV=2	2.386	0.6488	0.354328	0	0	0	3	3	0	1	1	0	0	0	0	3	3	1	4	4	2	12.7853	19.1339	16.6252	11.9318	18.0375	20.5969	0.84177	-0.67392
H4_HUMAN	P62805	Histone H4 OS=Homo sapiens OX=9606 GN=H4C1 PE=1 SV=2	3.69	0.7017	0.05894	1	1	1	9	8	8	12	10	10	9	7	7	1	1	1	15	11	11	20.0067	24.4968	26.2352	24.5259	18.154	26.1926	0.84946	0.622062
BLMH_HUMAN	Q13867	Bleomycin hydrolase OS=Homo sapiens OX=9606 GN=BLMH PE=1 SV=1	3.344	0.6559	0.034209	0	0	0	13	13	13	7	7	7	1	1	1	2	2	2	11	11	11	12.539	20.7117	19.1133	16.2351	16.5003	21.4032	0.85392	-0.59152
PSA1_HUMAN	P25786	Proteasome subunit alpha type-1 OS=Homo sapiens OX=9606 GN=PSMA1 PE=1 SV=1	2.114	0.6447	0.042116	0	0	0	2	2	2	2	2	2	0	0	0	1	1	1	2	2	2	10.6811	17.9979	17.8539	10.4373	15.773	18.5458	0.869804	0.592299
PSA3_HUMAN	P25788	Proteasome subunit alpha type-3 OS=Homo sapiens OX=9606 GN=PSMA3 PE=1 SV=2	1.845	0.5087	0.23222	0	0	0	1	1	1	1	1	1	0	0	0	0	0	0	3	3	3	11.5407	16.9507	16.6844	11.8296	11.9943	19.7246	0.871403	0.542399
LYSC_HUMAN	P61626	Lysozyme C OS=Homo sapiens OX=9606 GN=LYZ PE=1 SV=1	2.847	0.6672	0.075506	1	1	1	4	4	4	4	4	4	5	5	5	3	3	3	2	2	2	17.9224	21.0068	21.4303	20.4185	19.6001	19.7561	0.871798	0.19497
HMGN1_HUMAN	P05114	Non-histone chromosomal protein HMG-14 OS=Homo sapiens OX=9606 GN=HMGN1 PE=1 SV=3	3.298	0.6212	0.459938	0	0	0	3	2	2	1	1	1	1	1	1	0	0	0	1	1	1	11.4154	20.5553	18.0506	17.5768	12.6624	18.1759	0.876698	0.535392
FILA_HUMAN	P20930	Filaggrin OS=Homo sapiens OX=9606 GN=FLG PE=1 SV=3	4.083	0.7446	0.005969	5	4	4	24	20	20	9	8	8	3	3	3	8	8	8	27	25	25	15.1374	18.0716	17.8024	14.5695	15.7159	19.8395	0.881087	0.295512
LORI_HUMAN	P23490	Loricrin OS=Homo sapiens OX=9606 GN=LOR PE=1 SV=2	1.984	0.4726	0.10909	0	0	0	2	1	1	1	1	1	0	0	0	1	1	1	1	1	1	11.2845	22.953	21.2749	12.2195	21.2612	23.7262	0.916331	-0.564816
DEK_HUMAN	P35659	Protein DEK OS=Homo sapiens OX=9606 GN=DEK PE=1 SV=1	2.125	0.5069	0.637278	0	0	0	1	1	1	1	1	1	2	2	2	0	0	0	1	1	1	11.6703	17.5667	17.0558	18.1669	10.8014	16.3915	0.920104	0.310992
GSDMA_HUMAN	Q96QA5	Gasdermin-A OS=Homo sapiens OX=9606 GN=GSDMA PE=1 SV=4	3.645	0.6856	0.030037	1	1	1	3	3	3	2	2	2	1	1	1	3	3	3	4	4	4	16.6868	20.0127	18.8818	17.1634	18.6792	20.1318	0.924535	-0.130993
DDX17_HUMAN	Q92841	Probable ATP-dependent RNA helicase DDX17 OS=Homo sapiens OX=9606 GN=DDX17 PE=1 SV=2	2.724	0.6179	0.122496	0	0	0	2	2	0	6	6	2	1	1	0	0	0	0	4	4	2	12.3014	16.2675	19.0194	16.6808	12.5807	19.0984	0.929324	-0.25718
AT1A1_HUMAN	P05023	Sodium/potassium-transporting ATPase subunit alpha-1 OS=Homo sapiens OX=9606 GN=ATP1A1 PE=1 SV=1	1.687	0.5745	0.750197	0	0	0	0	0	0	3	3	2	1	1	0	0	0	0	2	2	1	12.831	11.3578	16.5981	14.2859	10.7239	15.1972	0.930172	0.193353
ENPL_HUMAN	P14625	Endoplasmin OS=Homo sapiens OX=9606 GN=HSP90B1 PE=1 SV=1	2.021	0.5205	0.316515	0	0	0	1	1	0	1	1	0	1	1	0	0	0	0	2	2	1	11.6914	16.4159	14.8993	15.0242	11.9898	16.4853	0.936002	-0.16422
CASPE_HUMAN	P31944	Caspase-14 OS=Homo sapiens OX=9606 GN=CASP14 PE=1 SV=2	4.341	0.7451	0.072293	1	1	1	14	12	12	4	4	4	2	2	2	3	3	3	15	13	13	15.6463	22.26	19.1472	15.3627	18.9718	22.0602	0.93952	0.219586
CALL5_HUMAN	Q9NZT1	Calmodulin-like protein 5 OS=Homo sapiens OX=9606 GN=CALML5 PE=1 SV=2	3.923	0.6882	0.347383	0	0	0	1	1	1	1	1	1	0	0	0	1	1	1	7	6	6	13.699	21.2851	20.2754	11.7685	20.1231	24.243	0.950018	-0.291693
HS71L_HUMAN	P34931	Heat shock 70 kDa protein 1-like OS=Homo sapiens OX=9606 GN=HSPA1L PE=1 SV=2	3.322	0.702	0.029978	2	2	0	7	5	1	10	9	0	7	7	0	4	4	0	9	7	0	18.6557	19.1882	20.9383	20.0475	18.1492	20.4686	0.970564	0.0389512
TBB4B_HUMAN	P68371	Tubulin beta-4B chain OS=Homo sapiens OX=9606 GN=TUBB4B PE=1 SV=1	3.345	0.7187	0.007294	2	2	0	8	8	1	10	9	0	5	5	0	3	3	0	14	13	1	17.0007	20.4553	21.4015	19.4526	17.8733	21.6727	0.979649	-0.0470308
DSC3_HUMAN	Q14574	Desmocollin-3 OS=Homo sapiens OX=9606 GN=DSC3 PE=1 SV=3	3.53	0.7071	0.135188	0	0	0	1	1	1	1	1	1	0	0	0	0	0	0	6	6	5	12.017	15.7898	14.8237	10.742	12.4116	19.694	0.981742	-0.0723639
PRDX1_HUMAN	Q06830	Peroxiredoxin-1 OS=Homo sapiens OX=9606 GN=PRDX1 PE=1 SV=1	3.122	0.6759	0.03072	3	3	2	7	7	4	6	6	4	1	1	0	4	4	3	10	10	7	19.338	21.2572	21.1106	17.6345	19.7299	24.2024	0.982924	0.0462875
G3PT_HUMAN	O14556	Glyceraldehyde-3-phosphate dehydrogenase, testis-specific OS=Homo sapiens OX=9606 GN=GAPDHS PE=1 SV=2	1.801	0.5436	0.225828	1	1	0	1	1	0	3	3	1	2	2	0	1	1	0	1	1	0	19.1617	20.6493	20.791	20.1142	19.6935	20.8345	0.98376	-0.013394
TBB5_HUMAN	P07437	Tubulin beta chain OS=Homo sapiens OX=9606 GN=TUBB PE=1 SV=2	3.345	0.7187	0.007294	2	2	0	9	9	1	12	11	1	7	7	1	3	3	0	16	15	1	17.0007	20.728	21.7023	19.9064	17.8733	21.7597	0.985115	-0.0361226
DDX5_HUMAN	P17844	Probable ATP-dependent RNA helicase DDX5 OS=Homo sapiens OX=9606 GN=DDX5 PE=1 SV=1	2.724	0.6179	0.122496	0	0	0	2	2	0	6	6	2	2	2	1	0	0	0	4	4	2	11.9634	16.3861	19.4581	17.2316	11.7487	18.9562	0.989515	-0.0429834
PRDX2_HUMAN	P32119	Peroxiredoxin-2 OS=Homo sapiens OX=9606 GN=PRDX2 PE=1 SV=5	3.148	0.6433	0.183377	3	3	2	6	6	5	4	4	3	2	2	1	3	3	2	8	7	6	19.8743	22.1484	20.6186	18.5189	19.8272	24.3424	0.993747	-0.0157312
